# Supplementary material
Source: publisher site journal article supplement (https://www.dovepress.com/article/570000)
Supplement: Supplementary file 1 [file 570000%20Revised%20Supplementary%20Material.docx]

**Supplementary Appendix**

**FGF21 exacerbates obesity-induced airway hyperresponsiveness and FGFR1-dependent mast cell activation in mice**

Lulu Ren1, *, Lingling Xuan1, Jie Zhang1, Wen Zhang2, Zhuoling An2, *

1Medical Research Center, Beijing Institute of Respiratory Medicine and Beijing Chao-Yang Hospital, Capital Medical University, Beijing, China.

2Department of Pharmacy, Beijing Chao-Yang Hospital, Capital Medical University,

100020, China

*Corresponding author.

Lulu Ren

8 Gongren Tiyuchang Nanlu, Beijing 100020, China.

Tel: 86-010-85231720

E-mail: [lulu1993217@163.com](mailto:lulu1993217@163.com；anzhuoling@163.com)

[Zhuoling An](mailto:lulu1993217@163.com；anzhuoling@163.com)

[8 Gongren Tiyuchang Nanlu, Beijing 100020, China.](mailto:lulu1993217@163.com；anzhuoling@163.com)

[Tel: 86-010-85231464.](mailto:lulu1993217@163.com；anzhuoling@163.com)

[E-mail：anzhuoling@163.com](mailto:lulu1993217@163.com；anzhuoling@163.com)

**Figure S1**

**
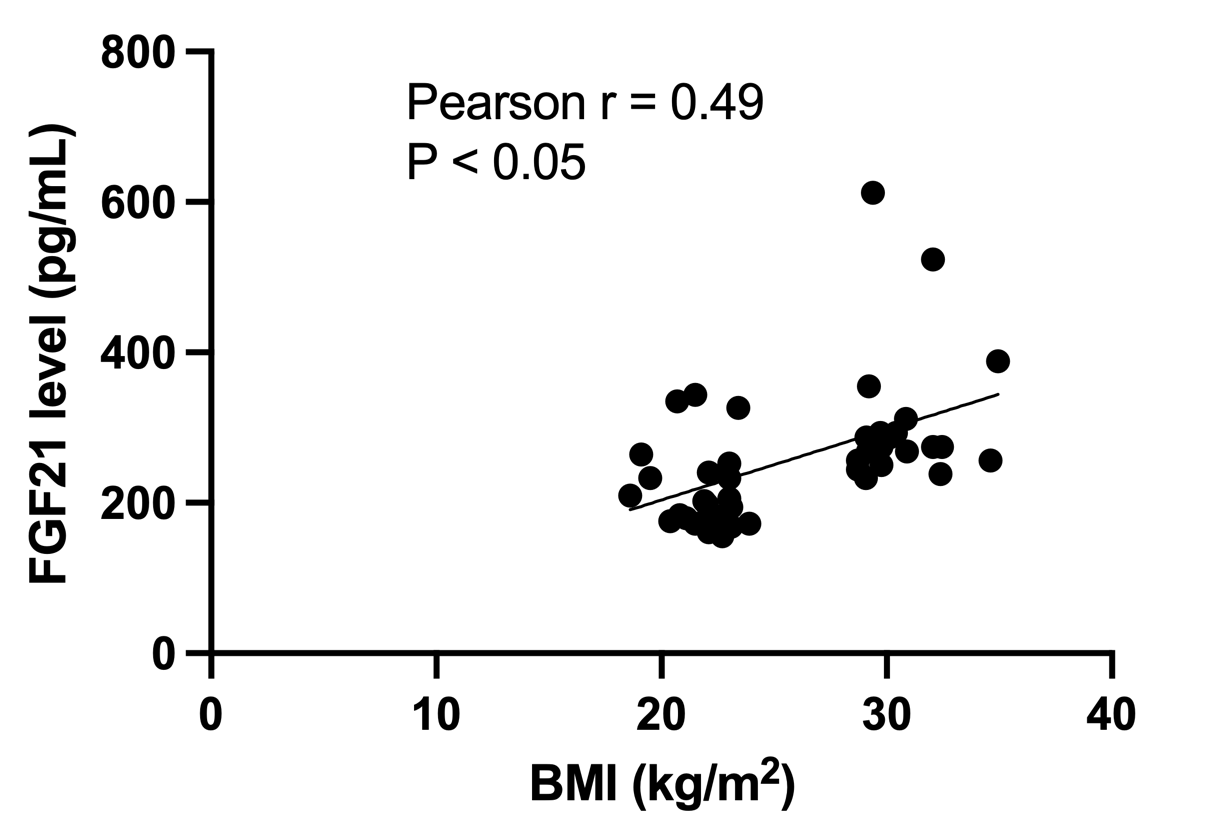
**

**Figure S1. Pearson correlation analyses of FGF21 levels against BMI in patients with asthma.** n=43.

**Figure S2**

**
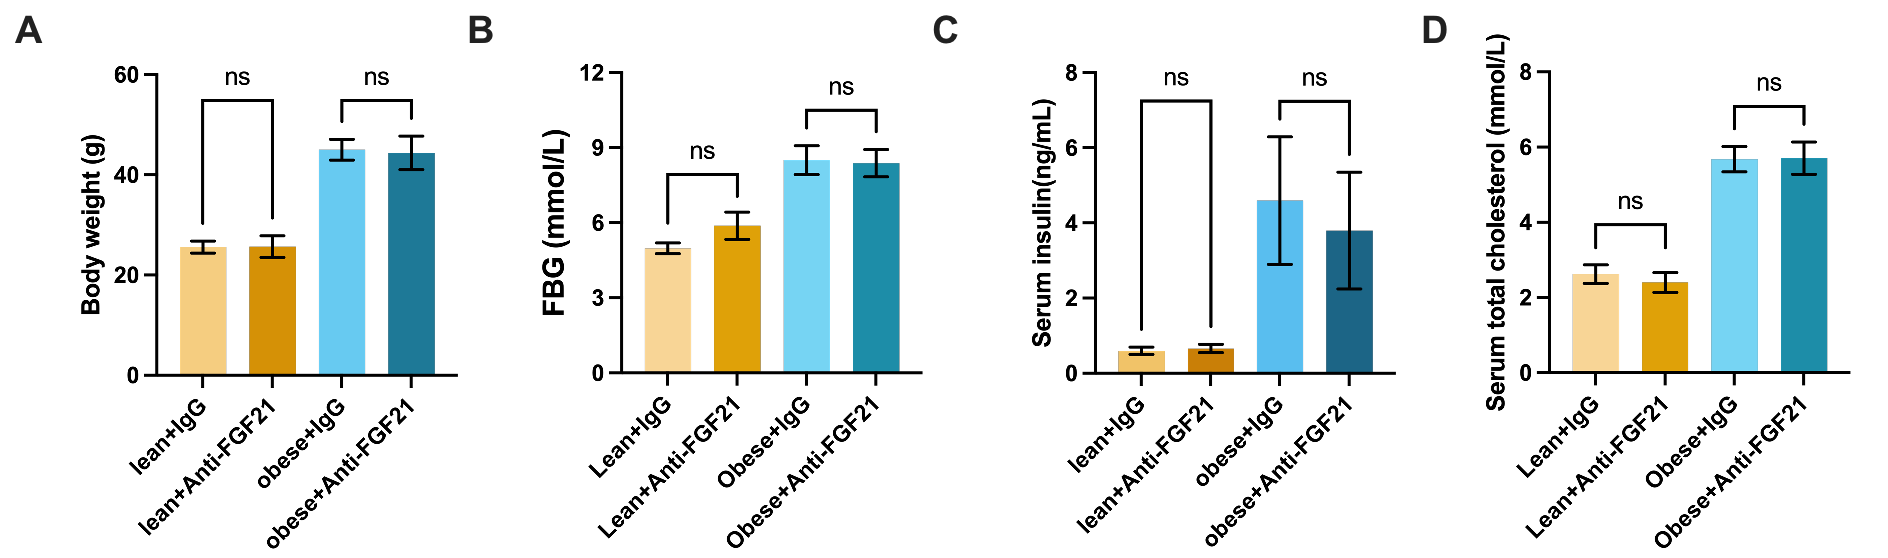
**

**Figure S2. No significant metabolic alterations were observed following 12 days of Anti-FGF21 treatment.** Body weight (A), fast blood glucose (FBG)(B), serum insulin (C) , and serum total cholesterol (D) of mice treated with Anti-FGF21 or IgG antibody. Data were shown as means ± SEMs. n = 5; ns, not significant.

**Figure S3**

**
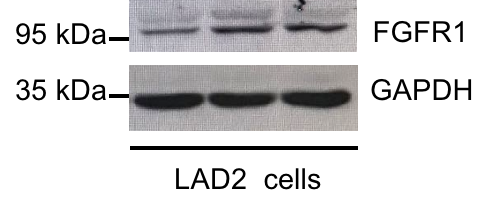
**

**Figure S3. Measurement of FGFR1 expression using Western Blotting.** n=3.

**Table S1 Primers for RT-PCR**

| **Human Genes** | | **Primers (5'->3')** |
| --- | --- | --- |
| *SREBF1* | Forward | CGGAACCATCTTGGCAACAGT |
|  | Reverse | CGCTTCTCAATGGCGTTGT |
| *HMGCR* | Forward | TGATTGACCTTTCCAGAGCAAG |
|  | Reverse | CTAAAATTGCCATTCCACGAGC |
| *HMGCS1* | Forward | CTCTTGGGATGGACGGTATGC |
|  | Reverse | GCTCCAACTCCACCTGTAGG |
| *SQLE* | Forward | GATGATGCAGCTATTTTCGAGGC |
|  | Reverse | CCTGAGCAAGGATATTCACGACA |
| *LSS* | Forward | GCACTGGACGGGTGATTATGG |
|  | Reverse | TCTCTTCTCTGTATCCGGCTG |
| *DHCR7* | Forward | GCAGGGGTTGTGAACAAGTAT |
|  | Reverse | GAGACGGCATAGCCAAGGAT |
| *DHCR24* | Forward | GCCGCTCTCGCTTATCTTCG |
|  | Reverse | GTCTTGCTACCCTGCTCCTT |
| *GAPDH* | Forward | ACAACTTTGGTATCGTGGAAGG |
|  | Reverse | GCCATCACGCCACAGTTTC |
| *FGF21* | Forward | GCCTTGAAGCCGGGAGTTATT |
|  | Reverse | GTGGAGCGATCCATACAGGG |
| *KLB* | Forward | TTCTGGGGTATTGGGACTGGA |
|  | Reverse | CCATTCGTGCTGCTGACATTTT |
| *FGFR1* | Forward | GGCTACAAGGTCCGTTATGCC |
|  | Reverse | GATGCTGCCGTACTCATTCTC |
| *FGFR2* | Forward | GGAAAGTGTGGTCCCATCTGA |
|  | Reverse | TCCAGGTGGTACGTGTGATTG |
| *FGFR3* | Forward | CCCAAATGGGAGCTGTCTCG |
|  | Reverse | CCCGGTCCTTGTCAATGCC |
